# Supplementary material for: Psychological distress and cancer pain: Results from a controlled cross-sectional survey in China
Source: Sci Rep. 2017 Jan 11;7:39397. doi: 10.1038/srep39397 (PMC5225451; doi:10.1038/srep39397)
Supplement: Supplementary Information [file srep39397-s1.pdf]

**Psychological distress and cancer pain: Results from a controlled cross-sectional survey in  
China**

**Running head: Psychological distress and cancer pain in Chinese-cancer-patients**

Xiao-mei Li<sup>1,\*</sup>, Wen-hua Xiao<sup>2</sup>, Ping Yang<sup>3</sup>, Hui-xia Zhao<sup>2</sup>

<sup>1</sup>Department of Medical Oncology, Chinese PLA General Hospital, Beijing, No.28, Fuxing Road, Haidian district, Beijing 100853, China;

<sup>2</sup>Department of Medical Oncology, the First Affiliated Hospital of Chinese PLA General Hospital, Beijing 100048, China;

<sup>3</sup>Department of Medical Oncology, PLA Navy General Hospital, Beijing 100048, China.

**\* Corresponding author:**

Dr. Xiaomei Li

Department of Medical Oncology, Chinese PLA General Hospital

No.28, Fuxing Road, Haidian district, Beijing 100853, China

Tel: +86-10- 68182255, Fax: +86-10- 68182255

Email: lixiaomei201306@126.com

Supplementary Table 1. Collinearity test among pain intensity, pain interferences and pain relief percentages

| Variables               | Tolerance | Variance inflation<br>factor (VIF) | P value |
|-------------------------|-----------|------------------------------------|---------|
| Pain intensity          | 0.083     | 12.121                             | <0.05   |
| Pain interferences      | 0.069     | 14.546                             | <0.05   |
| Pain relief percentages | 0.047     | 21.325                             | <0.05   |
